# Supplementary material
Source: PubMed Central journal article supplement (PMC6150732)
Supplement: nn7b07669_si_001.pdf [file nn7b07669_si_001.pdf]

## Structural Characterization of Native and Modified Encapsulins as Nanoplatfoms for *In Vitro* Catalysis and Cellular Uptake

Rindia M. Putri,<sup>†</sup> Carolina Allende-Ballesteros,<sup>‡</sup> Daniel Luque,<sup>‡,§</sup> Robin Klem,<sup>†</sup> Katerina-Asteria Rousou,<sup>†</sup> Aijie Liu,<sup>†</sup> Christoph H.-H. Traulsen,<sup>†</sup> W. Frederik Rurup,<sup>†</sup> Melissa S.T. Koay,<sup>†</sup> José R. Castón,<sup>‡\*</sup> Jeroen J.L.M. Cornelissen<sup>†\*</sup>

<sup>†</sup>Department of Biomolecular Nanotechnology, MESA+ Institute for Nanotechnology, University of Twente, 7500 AE Enschede, The Netherlands

<sup>‡</sup>Department of Structure of Macromolecules, Centro Nacional de Biotecnología/CSIC, Cantoblanco, 28049 Madrid, Spain

<sup>§</sup>Centro Nacional de Microbiología/Instituto de Salud Carlos III, 28220 Majadahonda, Madrid, Spain

\*Correspondence to: j.j.l.m.cornelissen@utwente.nl; jrcaston@cnb.csic.es

### S1. Native encapsulin (DyP-E) response to variation of ionic strength

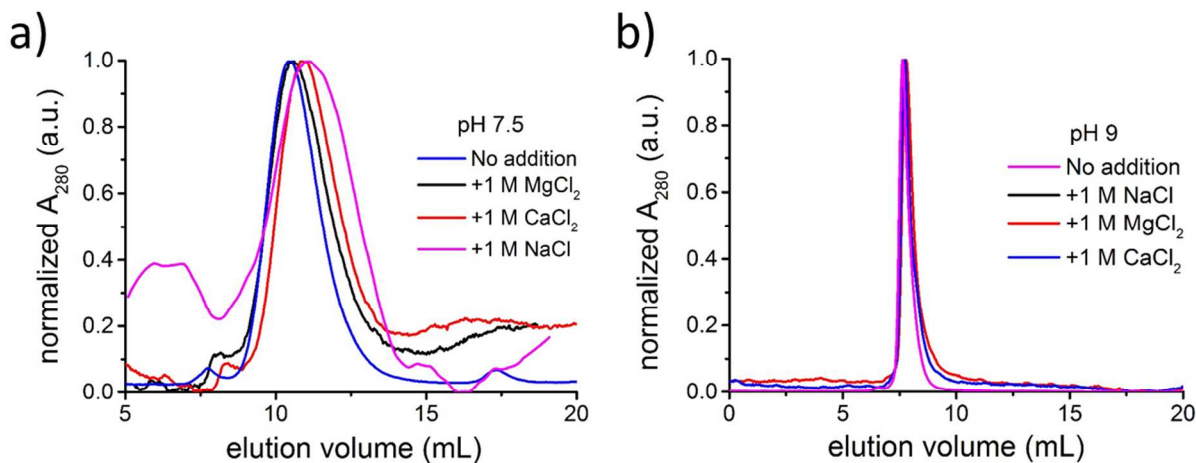

**Figure S1. Characterization of encapsulin at different ionic strength.** (a) Size-exclusion profiles of native encapsulin at native pH (pH 7.5) in the presence of different salts monitored at  $\lambda = 280$  nm, revealing a single peak of encapsulin ( $V = 10 - 12$  mL) for each profile. (b) Size-exclusion profiles of native encapsulin at elevated pH (pH 9) in the presence of different salts monitored at  $\lambda = 280$  nm, revealing a single peak of encapsulin ( $V = 9$  mL) for each profile.

## S2. Native encapsulin (DyP-E) response to addition of organic solvents

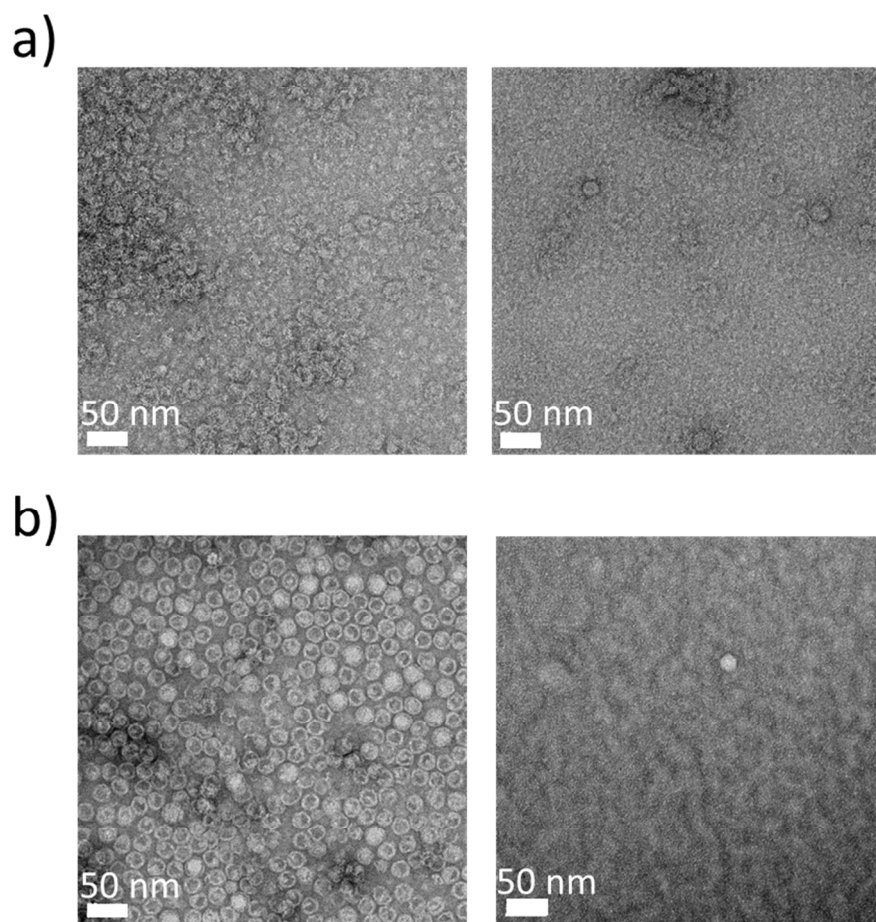

**Figure S2. Characterization of encapsulin in the presence of organic solvent.** TEM images of native encapsulin (size around 20 nm) in the presence of (a) DMSO (left: 20% right: 40%) and (b) ethanol (left: 20% right: 40%). All samples were in Tris-HCl buffer pH 7.5.

### S3. Analyses of empty encapsulin (nl-E)

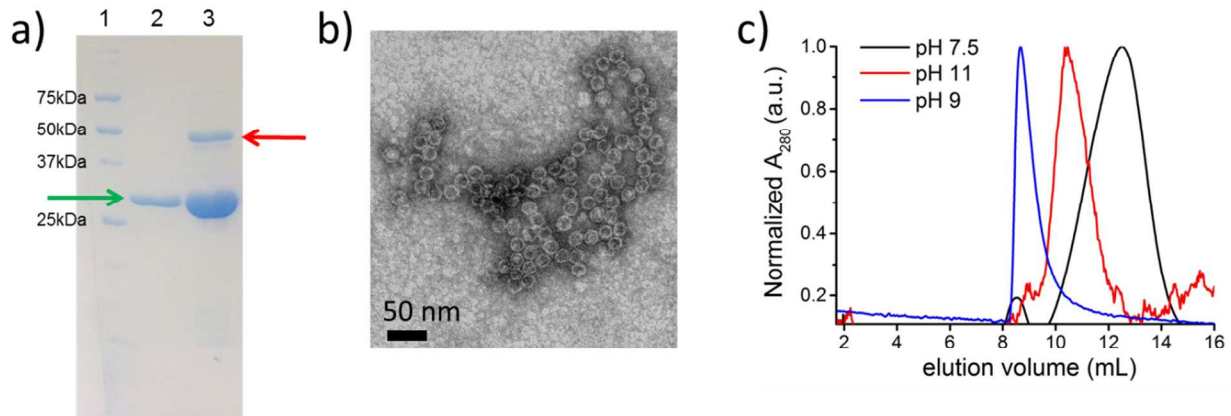

**Figure S3. Characterization of empty encapsulin.** (a) Denaturing gel electrophoresis revealing the encapsulin band (~28 kDa, green arrow) and the cargo DyP band (~50 kDa, red arrow). Lane 1 corresponds to protein marker and lane 2 and 3 correspond to empty (nl-E) and native (DyP) particles, respectively. (b) TEM image of nl-E at pH 7.5. (c) Size-exclusion profiles of nl-E at pH 7.5 (black line), pH 9 (blue line) and pH 11 (red line).

### S4. Cascade catalysis of GOx and surface-immobilized DyP-E

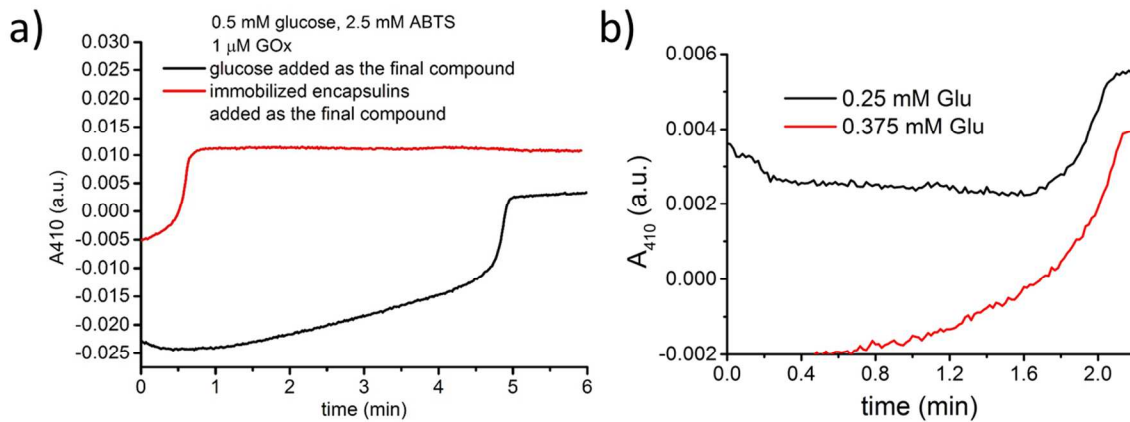

**Figure S4. Different order of addition resulting in different “lag” phase.** (a) At a fixed concentration of all substrates and enzymes, the “lag” phase is longer if the substrate glucose is as the final component to the system (black line, reaction starts at  $t = 5$  min). On the contrary, if the surface-immobilized encapsulin is added to the mixture of GOx-glucose, the “lag” phase is significantly shortened (red line). Two different experiments (red and black lines) result in the same value of slope  $dA/dt$  (i.e., 0.096), indicating the reproducibility of the assay. (b) Catalytic assay at lower concentration of substrate glucose, i.e., using 0.25 mM (black line) and 0.375 mM (red line) glucose.

**Table S1. Reaction rates derived from  $dA_{410}/dt$  at different substrate concentrations**

| [Glu] (mM) | $dA_{410}/dt$ | $v$ ( $\mu\text{M}/\text{min}$ ) |
|------------|---------------|----------------------------------|
| 0.25       | 0.016         | 0.45                             |
| 0.38       | 0.017         | 0.46                             |
| 0.5        | 0.096         | 2.67                             |
| 2.5        | 0.041         | 1.14                             |
| 3.2        | 0.056         | 1.57                             |
| 5.0        | 0.066         | 1.83                             |

### S5. Stability of modified encapsulin (TFP-E) over time

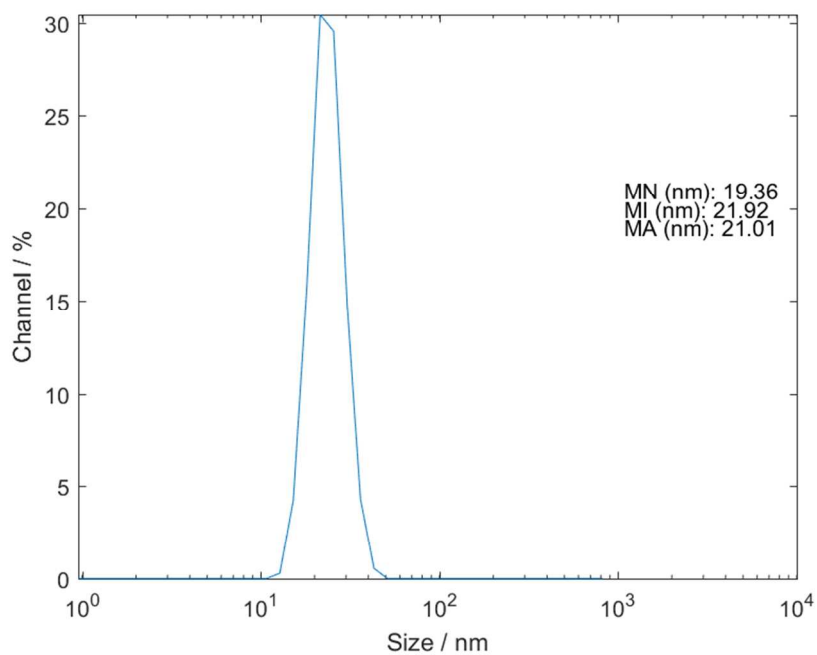

**Figure S5. Characterization of modified encapsulin with a fluorescent protein TFP cargo (TFP-E).** Size distribution of TFP-E particles over five years of storage at  $4^\circ\text{C}$ , revealing the presence of intact particles with the expected size of around 20 nm.
